# Supplementary material for: Comparative efficacy of Knema retusa extract delivery via PEG-b-PCL, niosome, and their combination against Acanthamoeba triangularis genotype T4: characterization, inhibition, anti-adhesion, and cytotoxic activity
Source: PeerJ journal article supplement (doi:10.7717/peerj.18452), 2024-11-15
Supplement: Data1.xlsx [file Data1.xlsx]

## Sheet: Sheet1
Wavelenght (nm)	KRe-0.50 mg/mL	KRe-0.25 mg/mL	KRe-0.125 mg/mL	KRe-0.0625 mg/mL	KRe-0.03125 mg/mL
190	-0.434	-0.357	-0.424	-0.23	0.356
191	-0.513	-0.463	-0.602	-0.374	0.608
192	-0.423	-0.387	-0.561	-0.282	0.815
193	-0.211	-0.156	-0.509	-0.099	0.876
194	0.066	-0.064	-0.5	0.048	0.782
195	0.144	-0.046	-0.295	0.202	0.729
196	0.052	-0.034	-0.227	0.231	0.663
197	-0.049	-0.115	-0.067	0.381	0.644
198	-0.06	-0.313	-0.051	0.241	0.629
199	-0.013	-0.271	0.047	0.055	0.675
200	-0.03	-0.099	0.078	0.044	0.793
201	0.147	0.114	0.097	0.033	0.825
202	0.194	0.165	0.184	0.223	0.771
203	0.34	0.131	0.104	0.244	0.607
204	0.301	0.168	0.08	0.263	0.56
205	0.186	0.146	0.054	0.314	0.568
206	0.262	0.031	0.182	0.455	0.517
207	0.087	-0.077	0.224	0.595	0.501
208	0.135	0.078	0.335	0.68	0.472
209	0.084	0.331	0.412	0.65	0.427
210	0.103	0.423	0.597	0.571	0.388
211	0.229	0.339	0.68	0.563	0.35
212	0.113	0.222	0.731	0.542	0.322
213	0.035	0.256	0.792	0.54	0.301
214	-0.028	0.336	0.748	0.524	0.278
215	0.06	0.294	0.707	0.493	0.259
216	0.143	0.32	0.654	0.461	0.245
217	0.138	0.406	0.63	0.447	0.234
218	0.173	0.515	0.622	0.441	0.229
219	0.151	0.594	0.636	0.425	0.224
220	0.145	0.595	0.63	0.413	0.217
221	0.155	0.606	0.611	0.391	0.208
222	0.205	0.623	0.587	0.383	0.2
223	0.246	0.664	0.577	0.38	0.196
224	0.31	0.703	0.59	0.375	0.194
225	0.304	0.754	0.605	0.378	0.19
226	0.393	0.768	0.608	0.374	0.188
227	0.491	0.84	0.612	0.374	0.185
228	0.604	0.918	0.614	0.372	0.186
229	0.719	0.994	0.619	0.369	0.185
230	0.702	1.017	0.614	0.363	0.18
231	0.687	0.988	0.595	0.353	0.175
232	0.708	0.938	0.572	0.341	0.167
233	0.81	0.897	0.553	0.329	0.159
234	0.837	0.902	0.531	0.318	0.155
235	0.817	0.91	0.512	0.306	0.15
236	0.782	0.899	0.49	0.296	0.146
237	0.81	0.864	0.468	0.281	0.139
238	0.88	0.822	0.45	0.269	0.133
239	0.925	0.779	0.427	0.257	0.127
240	0.942	0.761	0.405	0.245	0.121
241	0.944	0.736	0.383	0.234	0.115
242	1.001	0.717	0.363	0.222	0.11
243	0.985	0.678	0.344	0.211	0.104
244	0.939	0.625	0.322	0.197	0.098
245	0.855	0.579	0.299	0.185	0.093
246	0.782	0.539	0.279	0.174	0.087
247	0.729	0.505	0.261	0.164	0.082
248	0.678	0.472	0.245	0.155	0.077
249	0.621	0.438	0.228	0.146	0.074
250	0.568	0.407	0.213	0.138	0.071
251	0.527	0.379	0.199	0.131	0.068
252	0.495	0.36	0.19	0.125	0.065
253	0.473	0.345	0.181	0.119	0.061
254	0.46	0.336	0.174	0.114	0.059
255	0.453	0.332	0.17	0.111	0.059
256	0.455	0.33	0.169	0.11	0.06
257	0.461	0.328	0.171	0.111	0.061
258	0.471	0.327	0.172	0.113	0.06
259	0.482	0.331	0.175	0.113	0.06
260	0.493	0.337	0.178	0.113	0.059
261	0.506	0.343	0.179	0.113	0.06
262	0.523	0.35	0.181	0.114	0.06
263	0.544	0.36	0.185	0.117	0.062
264	0.571	0.372	0.192	0.121	0.064
265	0.599	0.388	0.2	0.126	0.067
266	0.634	0.407	0.208	0.131	0.07
267	0.67	0.428	0.219	0.136	0.073
268	0.705	0.447	0.229	0.14	0.074
269	0.742	0.47	0.241	0.146	0.076
270	0.773	0.5	0.253	0.153	0.08
271	0.822	0.529	0.268	0.162	0.085
272	0.874	0.556	0.282	0.171	0.089
273	0.909	0.58	0.294	0.177	0.092
274	0.923	0.607	0.306	0.184	0.095
275	0.929	0.637	0.32	0.192	0.099
276	0.955	0.665	0.335	0.2	0.103
277	0.971	0.696	0.351	0.209	0.108
278	0.998	0.721	0.363	0.216	0.111
279	1.018	0.746	0.375	0.224	0.114
280	1.05	0.762	0.386	0.23	0.117		KRe concentration (mg/mL)	OD 286 nm
281	1.084	0.773	0.397	0.235	0.119		0.25	0.801
282	1.076	0.786	0.406	0.24	0.122		0.125	0.411
283	1.081	0.798	0.411	0.244	0.124		0.0625	0.242
284	1.037	0.804	0.414	0.246	0.124		0.03125	0.122
285	1.03	0.804	0.413	0.244	0.124
286	1.002	0.801	0.411	0.242	0.122
287	1.017	0.788	0.406	0.239	0.12
288	1.014	0.777	0.399	0.235	0.118
289	1.004	0.757	0.388	0.229	0.115
290	1.02	0.735	0.371	0.219	0.11
291	0.999	0.702	0.351	0.207	0.104
292	0.981	0.654	0.329	0.195	0.098
293	0.916	0.605	0.304	0.181	0.092
294	0.856	0.555	0.281	0.168	0.086
295	0.798	0.507	0.256	0.154	0.08
296	0.731	0.462	0.234	0.142	0.073
297	0.658	0.42	0.213	0.13	0.067
298	0.589	0.382	0.194	0.121	0.062
299	0.527	0.349	0.178	0.111	0.059
300	0.472	0.318	0.163	0.104	0.056
301	0.425	0.291	0.151	0.097	0.053
302	0.39	0.269	0.14	0.092	0.05
303	0.362	0.252	0.132	0.087	0.049
304	0.339	0.239	0.125	0.082	0.047
305	0.32	0.228	0.121	0.079	0.045
306	0.304	0.221	0.117	0.077	0.043
307	0.293	0.212	0.113	0.077	0.043
308	0.283	0.203	0.109	0.075	0.043
309	0.273	0.195	0.105	0.072	0.041
310	0.266	0.19	0.102	0.068	0.04
311	0.259	0.188	0.1	0.068	0.04
312	0.253	0.184	0.099	0.066	0.039
313	0.246	0.179	0.097	0.064	0.039
314	0.24	0.174	0.094	0.062	0.038
315	0.235	0.171	0.092	0.062	0.037
316	0.233	0.17	0.092	0.062	0.037
317	0.231	0.169	0.092	0.062	0.038
318	0.227	0.166	0.091	0.061	0.038
319	0.223	0.164	0.089	0.061	0.038
320	0.219	0.159	0.087	0.06	0.037
321	0.217	0.159	0.088	0.061	0.037
322	0.215	0.156	0.087	0.06	0.037
323	0.213	0.155	0.086	0.057	0.036
324	0.21	0.152	0.084	0.056	0.035
325	0.207	0.148	0.082	0.053	0.034
326	0.204	0.147	0.081	0.053	0.034
327	0.2	0.145	0.08	0.053	0.034
328	0.197	0.144	0.079	0.054	0.034
329	0.194	0.143	0.079	0.054	0.035
330	0.191	0.141	0.077	0.054	0.035
331	0.19	0.141	0.077	0.054	0.036
332	0.188	0.139	0.078	0.054	0.035
333	0.186	0.136	0.079	0.053	0.036
334	0.182	0.131	0.076	0.051	0.034
335	0.179	0.126	0.072	0.048	0.031
336	0.174	0.125	0.07	0.047	0.031
337	0.169	0.122	0.069	0.046	0.031
338	0.167	0.121	0.069	0.046	0.031
339	0.166	0.117	0.068	0.046	0.031
340	0.165	0.117	0.067	0.046	0.031
341	0.161	0.115	0.066	0.046	0.032
342	0.158	0.114	0.065	0.045	0.031
343	0.156	0.113	0.065	0.043	0.03
344	0.155	0.11	0.064	0.042	0.029
345	0.151	0.109	0.062	0.042	0.029
346	0.149	0.107	0.061	0.042	0.03
347	0.146	0.106	0.061	0.043	0.031
348	0.145	0.105	0.062	0.044	0.032
349	0.144	0.105	0.062	0.044	0.031
350	0.141	0.103	0.06	0.042	0.031
351	0.138	0.101	0.058	0.041	0.03
352	0.133	0.095	0.055	0.039	0.028
353	0.13	0.092	0.055	0.038	0.027
354	0.128	0.091	0.054	0.037	0.028
355	0.126	0.09	0.053	0.037	0.028
356	0.125	0.089	0.053	0.038	0.027
357	0.122	0.087	0.053	0.038	0.026
358	0.12	0.087	0.052	0.037	0.026
359	0.12	0.086	0.052	0.036	0.027
360	0.119	0.085	0.052	0.037	0.028
361	0.116	0.083	0.052	0.037	0.028
362	0.114	0.081	0.051	0.035	0.027
363	0.111	0.079	0.049	0.034	0.026
364	0.111	0.077	0.048	0.033	0.025
365	0.11	0.077	0.047	0.033	0.026
366	0.107	0.076	0.046	0.034	0.026
367	0.106	0.075	0.045	0.032	0.027
368	0.105	0.074	0.046	0.032	0.028
369	0.104	0.072	0.046	0.033	0.029
370	0.104	0.074	0.046	0.033	0.029
371	0.102	0.073	0.045	0.032	0.026
372	0.101	0.072	0.045	0.03	0.025
373	0.1	0.07	0.045	0.031	0.024
374	0.096	0.067	0.043	0.031	0.024
375	0.094	0.067	0.042	0.031	0.025
376	0.091	0.064	0.041	0.03	0.024
377	0.092	0.064	0.042	0.029	0.024
378	0.093	0.063	0.043	0.03	0.024
379	0.093	0.065	0.042	0.031	0.025
380	0.092	0.065	0.041	0.03	0.024
381	0.089	0.064	0.04	0.028	0.024
382	0.088	0.062	0.039	0.028	0.024
383	0.087	0.061	0.04	0.029	0.024
384	0.088	0.061	0.04	0.03	0.026
385	0.087	0.059	0.039	0.028	0.025
386	0.086	0.057	0.038	0.027	0.024
387	0.085	0.057	0.037	0.028	0.024
388	0.083	0.058	0.037	0.029	0.024
389	0.081	0.058	0.037	0.027	0.024
390	0.079	0.055	0.036	0.026	0.023
391	0.079	0.053	0.037	0.026	0.023
392	0.079	0.053	0.037	0.028	0.025
393	0.078	0.052	0.036	0.027	0.024
394	0.075	0.051	0.034	0.024	0.021
395	0.075	0.049	0.032	0.023	0.021
396	0.074	0.049	0.033	0.024	0.022
397	0.074	0.049	0.034	0.025	0.023
398	0.074	0.05	0.035	0.025	0.023
399	0.073	0.05	0.035	0.024	0.023
400	0.072	0.049	0.035	0.025	0.023
401	0.069	0.047	0.034	0.024	0.023
402	0.068	0.046	0.033	0.024	0.022
403	0.068	0.047	0.031	0.023	0.021
404	0.068	0.046	0.03	0.022	0.02
405	0.066	0.043	0.029	0.021	0.02
406	0.064	0.041	0.028	0.02	0.02
407	0.064	0.041	0.028	0.02	0.02
408	0.065	0.042	0.029	0.022	0.022
409	0.065	0.043	0.03	0.024	0.024
410	0.063	0.043	0.03	0.025	0.023
411	0.062	0.042	0.031	0.025	0.023
412	0.06	0.04	0.03	0.022	0.021
413	0.058	0.038	0.029	0.022	0.02
414	0.059	0.037	0.028	0.021	0.021
415	0.059	0.037	0.028	0.023	0.022
416	0.059	0.037	0.028	0.024	0.022
417	0.057	0.037	0.028	0.022	0.022
418	0.056	0.035	0.027	0.021	0.021
419	0.055	0.034	0.026	0.02	0.02
420	0.055	0.032	0.025	0.018	0.019
421	0.054	0.032	0.024	0.017	0.018
422	0.054	0.034	0.026	0.019	0.02
423	0.054	0.034	0.026	0.02	0.02
424	0.054	0.035	0.029	0.022	0.021
425	0.054	0.035	0.029	0.022	0.021
426	0.052	0.034	0.026	0.021	0.02
427	0.051	0.032	0.025	0.021	0.02
428	0.051	0.031	0.026	0.02	0.019
429	0.051	0.031	0.027	0.021	0.02
430	0.051	0.032	0.026	0.02	0.02
431	0.05	0.031	0.026	0.02	0.022
432	0.052	0.032	0.028	0.022	0.024
433	0.052	0.034	0.029	0.022	0.025
434	0.05	0.032	0.026	0.02	0.023
435	0.047	0.03	0.022	0.017	0.019
436	0.048	0.028	0.022	0.018	0.018
437	0.049	0.03	0.025	0.02	0.02
438	0.05	0.033	0.027	0.022	0.022
439	0.05	0.033	0.027	0.023	0.023
440	0.049	0.031	0.027	0.021	0.023
441	0.049	0.029	0.026	0.02	0.021
442	0.048	0.027	0.025	0.018	0.019
443	0.047	0.027	0.024	0.018	0.018
444	0.045	0.027	0.022	0.017	0.017
445	0.045	0.027	0.021	0.016	0.016
446	0.046	0.028	0.021	0.016	0.016
447	0.045	0.026	0.02	0.015	0.016
448	0.044	0.026	0.021	0.015	0.016
449	0.045	0.026	0.023	0.016	0.016
450	0.047	0.028	0.025	0.018	0.017
451	0.046	0.027	0.024	0.02	0.017
452	0.044	0.027	0.023	0.019	0.019
453	0.044	0.027	0.021	0.018	0.018
454	0.045	0.029	0.022	0.019	0.018
455	0.045	0.03	0.023	0.019	0.018
456	0.046	0.031	0.025	0.02	0.019
457	0.046	0.031	0.026	0.021	0.022
458	0.044	0.028	0.023	0.019	0.022
459	0.043	0.025	0.021	0.018	0.02
460	0.043	0.025	0.021	0.017	0.018
461	0.044	0.026	0.022	0.018	0.02
462	0.044	0.027	0.022	0.018	0.021
463	0.044	0.027	0.024	0.019	0.022
464	0.044	0.026	0.023	0.019	0.021
465	0.043	0.025	0.022	0.018	0.02
466	0.043	0.025	0.021	0.018	0.018
467	0.043	0.028	0.021	0.019	0.02
468	0.043	0.029	0.022	0.019	0.021
469	0.042	0.028	0.022	0.02	0.021
470	0.042	0.027	0.023	0.02	0.02
471	0.043	0.027	0.023	0.019	0.018
472	0.043	0.028	0.023	0.021	0.019
473	0.043	0.028	0.024	0.021	0.021
474	0.042	0.028	0.022	0.02	0.02
475	0.039	0.027	0.019	0.018	0.018
476	0.038	0.025	0.018	0.018	0.017
477	0.04	0.026	0.021	0.02	0.019
478	0.041	0.027	0.022	0.021	0.021
479	0.041	0.027	0.023	0.021	0.023
480	0.04	0.026	0.021	0.02	0.021
481	0.039	0.024	0.019	0.018	0.019
482	0.038	0.023	0.018	0.016	0.018
483	0.038	0.021	0.019	0.016	0.017
484	0.038	0.022	0.021	0.018	0.019
485	0.039	0.025	0.022	0.019	0.019
486	0.039	0.025	0.021	0.019	0.018
487	0.039	0.025	0.021	0.019	0.018
488	0.04	0.025	0.022	0.02	0.02
489	0.039	0.025	0.021	0.019	0.019
490	0.039	0.024	0.02	0.017	0.017
491	0.037	0.022	0.019	0.015	0.016
492	0.039	0.023	0.02	0.016	0.017
493	0.039	0.025	0.022	0.017	0.016
494	0.039	0.027	0.022	0.017	0.018
495	0.038	0.027	0.023	0.018	0.02
496	0.039	0.028	0.023	0.02	0.021
497	0.039	0.027	0.023	0.019	0.02
498	0.038	0.025	0.022	0.018	0.017
499	0.037	0.025	0.021	0.018	0.016
500	0.037	0.024	0.02	0.017	0.017
501	0.036	0.022	0.019	0.017	0.017
502	0.035	0.021	0.018	0.016	0.015
503	0.035	0.022	0.019	0.015	0.015
504	0.036	0.024	0.02	0.017	0.016
505	0.035	0.024	0.021	0.018	0.019
506	0.036	0.024	0.021	0.019	0.02
507	0.035	0.023	0.021	0.018	0.02
508	0.034	0.022	0.02	0.019	0.018
509	0.032	0.019	0.019	0.018	0.016
510	0.031	0.018	0.019	0.017	0.015
511	0.033	0.019	0.019	0.017	0.016
512	0.034	0.021	0.02	0.017	0.017
513	0.034	0.02	0.02	0.018	0.018
514	0.033	0.019	0.02	0.016	0.017
515	0.032	0.021	0.018	0.014	0.015
516	0.031	0.02	0.016	0.015	0.014
517	0.031	0.02	0.018	0.017	0.016
518	0.033	0.022	0.022	0.02	0.02
519	0.033	0.023	0.023	0.021	0.021
520	0.034	0.025	0.024	0.021	0.021
521	0.034	0.023	0.021	0.02	0.019
522	0.032	0.022	0.02	0.018	0.017
523	0.031	0.022	0.02	0.018	0.017
524	0.031	0.021	0.02	0.017	0.018
525	0.031	0.021	0.02	0.018	0.017
526	0.032	0.021	0.02	0.018	0.017
527	0.031	0.022	0.02	0.019	0.018
528	0.031	0.022	0.02	0.019	0.019
529	0.031	0.023	0.021	0.018	0.019
530	0.03	0.022	0.019	0.017	0.016
531	0.029	0.022	0.018	0.016	0.015
532	0.028	0.021	0.017	0.016	0.015
533	0.03	0.022	0.019	0.018	0.019
534	0.032	0.025	0.022	0.02	0.021
535	0.032	0.025	0.021	0.019	0.018
536	0.031	0.025	0.021	0.019	0.017
537	0.029	0.024	0.022	0.019	0.017
538	0.028	0.021	0.019	0.018	0.016
539	0.027	0.019	0.016	0.017	0.014
540	0.028	0.019	0.016	0.016	0.013
541	0.028	0.018	0.017	0.015	0.013
542	0.026	0.017	0.015	0.011	0.011
543	0.025	0.018	0.014	0.01	0.01
544	0.027	0.021	0.014	0.012	0.011
545	0.027	0.022	0.016	0.014	0.013
546	0.028	0.022	0.016	0.015	0.013
547	0.027	0.021	0.015	0.014	0.014
548	0.028	0.021	0.017	0.016	0.015
549	0.028	0.022	0.019	0.018	0.017
550	0.027	0.021	0.018	0.017	0.015
551	0.026	0.021	0.017	0.015	0.013
552	0.027	0.02	0.017	0.014	0.011
553	0.027	0.021	0.017	0.015	0.013
554	0.025	0.019	0.015	0.015	0.013
555	0.025	0.02	0.015	0.015	0.014
556	0.026	0.022	0.017	0.017	0.015
557	0.029	0.023	0.02	0.019	0.018
558	0.028	0.021	0.019	0.018	0.017
559	0.025	0.018	0.015	0.014	0.013
560	0.023	0.017	0.012	0.012	0.01
561	0.024	0.02	0.012	0.013	0.01
562	0.022	0.02	0.013	0.013	0.012
563	0.024	0.018	0.015	0.014	0.014
564	0.022	0.015	0.015	0.014	0.014
565	0.023	0.015	0.016	0.014	0.014
566	0.023	0.016	0.016	0.015	0.014
567	0.022	0.015	0.015	0.016	0.014
568	0.023	0.016	0.015	0.015	0.013
569	0.021	0.016	0.015	0.014	0.013
570	0.021	0.016	0.014	0.014	0.014
571	0.021	0.016	0.014	0.014	0.015
572	0.024	0.017	0.016	0.016	0.016
573	0.023	0.016	0.016	0.016	0.016
574	0.023	0.014	0.014	0.014	0.016
575	0.021	0.013	0.012	0.012	0.014
576	0.02	0.013	0.015	0.015	0.015
577	0.021	0.014	0.016	0.017	0.014
578	0.019	0.013	0.014	0.016	0.013
579	0.021	0.015	0.016	0.015	0.014
580	0.021	0.014	0.016	0.013	0.016
581	0.022	0.015	0.016	0.014	0.017
582	0.02	0.014	0.015	0.013	0.015
583	0.019	0.013	0.014	0.015	0.015
584	0.018	0.011	0.012	0.013	0.014
585	0.019	0.009	0.012	0.011	0.013
586	0.02	0.009	0.013	0.011	0.012
587	0.021	0.011	0.013	0.013	0.013
588	0.022	0.01	0.014	0.012	0.015
589	0.021	0.01	0.013	0.013	0.015
590	0.02	0.009	0.013	0.013	0.016
591	0.018	0.008	0.011	0.012	0.015
592	0.017	0.008	0.011	0.01	0.014
593	0.015	0.01	0.01	0.01	0.013
594	0.017	0.01	0.012	0.01	0.014
595	0.019	0.01	0.013	0.011	0.016
596	0.018	0.01	0.015	0.011	0.017
597	0.017	0.01	0.015	0.013	0.018
598	0.017	0.011	0.016	0.014	0.017
599	0.019	0.011	0.015	0.013	0.016
600	0.02	0.011	0.013	0.012	0.014
601	0.02	0.01	0.011	0.012	0.013
602	0.02	0.011	0.013	0.013	0.014
603	0.019	0.01	0.015	0.014	0.015
604	0.017	0.006	0.014	0.013	0.014
605	0.019	0.005	0.014	0.013	0.014
606	0.02	0.006	0.013	0.012	0.014
607	0.02	0.007	0.011	0.011	0.014
608	0.018	0.005	0.009	0.01	0.012
609	0.016	0.004	0.011	0.011	0.013
610	0.015	0.005	0.012	0.011	0.013
611	0.016	0.007	0.012	0.011	0.015
612	0.016	0.007	0.011	0.009	0.015
613	0.018	0.009	0.014	0.012	0.018
614	0.02	0.009	0.015	0.014	0.019
615	0.019	0.006	0.015	0.014	0.019
616	0.018	0.004	0.013	0.013	0.017
617	0.016	0.004	0.012	0.013	0.015
618	0.015	0.002	0.008	0.011	0.012
619	0.014	0.002	0.008	0.01	0.01
620	0.015	0.003	0.009	0.009	0.01
621	0.017	0.005	0.011	0.01	0.013
622	0.018	0.006	0.012	0.012	0.015
623	0.018	0.006	0.012	0.014	0.017
624	0.017	0.006	0.013	0.013	0.017
625	0.016	0.005	0.012	0.012	0.016
626	0.014	0.003	0.011	0.011	0.013
627	0.013	0.001	0.008	0.009	0.011
628	0.012	-0.001	0.007	0.008	0.009
629	0.013	-0.002	0.007	0.008	0.01
630	0.013	-0.001	0.009	0.01	0.013
631	0.014	0.003	0.013	0.013	0.018
632	0.015	0.004	0.014	0.012	0.018
633	0.015	0.003	0.011	0.01	0.015
634	0.014	0.001	0.008	0.009	0.012
635	0.016	0.003	0.011	0.012	0.015
636	0.015	0.002	0.012	0.013	0.017
637	0.014	0.001	0.011	0.011	0.015
638	0.013	0	0.01	0.008	0.012
639	0.015	0.001	0.013	0.01	0.014
640	0.014	0.002	0.014	0.011	0.017
641	0.014	0.004	0.014	0.013	0.019
642	0.013	0.003	0.012	0.013	0.017
643	0.016	0.003	0.011	0.014	0.017
644	0.015	0.002	0.013	0.014	0.02
645	0.015	0.001	0.013	0.013	0.02
646	0.012	-0.001	0.01	0.011	0.017
647	0.012	0.001	0.011	0.011	0.015
648	0.012	0.004	0.013	0.011	0.015
649	0.011	0.002	0.011	0.009	0.014
650	0.011	0	0.008	0.01	0.014
651	0.013	-0.001	0.009	0.011	0.015
652	0.013	0	0.011	0.011	0.017
653	0.013	-0.001	0.01	0.008	0.016
654	0.012	-0.001	0.011	0.01	0.018
655	0.013	-0.002	0.011	0.012	0.018
656	0.012	-0.003	0.009	0.011	0.019
657	0.011	-0.005	0.005	0.009	0.017
658	0.01	-0.005	0.005	0.009	0.017
659	0.012	-0.003	0.009	0.011	0.016
660	0.012	-0.002	0.009	0.011	0.015
661	0.011	-0.004	0.007	0.01	0.013
662	0.01	-0.005	0.005	0.009	0.012
663	0.009	-0.005	0.005	0.007	0.012
664	0.01	-0.004	0.006	0.005	0.013
665	0.01	-0.003	0.008	0.007	0.014
666	0.012	-0.001	0.009	0.01	0.015
667	0.012	-0.003	0.008	0.01	0.014
668	0.01	-0.004	0.006	0.007	0.012
669	0.009	-0.006	0.005	0.004	0.011
670	0.01	-0.004	0.006	0.005	0.013
671	0.013	-0.001	0.009	0.009	0.017
672	0.013	0.001	0.011	0.01	0.019
673	0.01	-0.001	0.009	0.007	0.015
674	0.009	-0.004	0.008	0.007	0.013
675	0.01	-0.003	0.009	0.009	0.015
676	0.013	-0.003	0.011	0.012	0.018
677	0.011	-0.004	0.011	0.011	0.017
678	0.01	-0.006	0.007	0.008	0.012
679	0.009	-0.007	0.006	0.006	0.012
680	0.01	-0.009	0.005	0.004	0.013
681	0.009	-0.01	0.004	0.005	0.015
682	0.011	-0.006	0.007	0.011	0.016
683	0.013	0	0.011	0.015	0.018
684	0.016	0.002	0.014	0.015	0.02
685	0.016	0.002	0.014	0.015	0.019
686	0.015	0.002	0.014	0.016	0.019
687	0.013	0	0.013	0.015	0.019
688	0.01	-0.003	0.01	0.011	0.017
689	0.01	-0.003	0.009	0.01	0.016
690	0.011	-0.003	0.009	0.008	0.015
691	0.009	-0.004	0.008	0.009	0.015
692	0.009	-0.004	0.007	0.009	0.016
693	0.008	-0.004	0.009	0.009	0.016
694	0.01	-0.003	0.011	0.009	0.015
695	0.01	-0.005	0.009	0.009	0.014
696	0.011	-0.002	0.009	0.012	0.017
697	0.011	0	0.008	0.013	0.018
698	0.009	-0.004	0.004	0.008	0.015
699	0.008	-0.009	0.003	0.007	0.012
700	0.009	-0.006	0.006	0.009	0.015
701	0.011	-0.001	0.009	0.012	0.017
702	0.013	0.001	0.01	0.015	0.019
703	0.011	-0.003	0.007	0.011	0.017
704	0.008	-0.006	0.005	0.009	0.014
705	0.006	-0.008	0.004	0.007	0.012
706	0.008	-0.005	0.009	0.011	0.015
707	0.008	-0.005	0.011	0.01	0.018
708	0.011	-0.004	0.012	0.013	0.02
709	0.011	-0.003	0.012	0.016	0.02
710	0.013	0.001	0.016	0.019	0.021
711	0.014	0.002	0.017	0.018	0.023
712	0.015	0	0.016	0.015	0.024
713	0.013	-0.003	0.013	0.01	0.019
714	0.01	-0.004	0.013	0.01	0.019
715	0.007	-0.007	0.01	0.008	0.015
716	0.005	-0.008	0.007	0.008	0.016
717	0.008	-0.009	0.006	0.01	0.014
718	0.01	-0.006	0.011	0.012	0.019
719	0.011	-0.004	0.013	0.013	0.018
720	0.011	-0.004	0.013	0.011	0.019
721	0.011	-0.004	0.01	0.01	0.019
722	0.01	-0.006	0.008	0.01	0.019
723	0.011	-0.004	0.01	0.01	0.018
724	0.011	-0.007	0.01	0.01	0.013
725	0.01	-0.007	0.009	0.012	0.014
726	0.009	-0.008	0.008	0.01	0.015
727	0.009	-0.005	0.011	0.009	0.018
728	0.005	-0.006	0.009	0.007	0.015
729	0.007	-0.005	0.008	0.009	0.017
730	0.009	-0.004	0.008	0.008	0.017
731	0.009	-0.002	0.009	0.007	0.018
732	0.008	-0.001	0.009	0.01	0.019
733	0.009	-0.003	0.01	0.01	0.016
734	0.011	-0.008	0.01	0.009	0.013
735	0.01	-0.012	0.007	0.007	0.012
736	0.014	-0.008	0.009	0.01	0.018
737	0.012	-0.007	0.011	0.01	0.019
738	0.009	-0.007	0.01	0.01	0.021
739	0.008	-0.008	0.012	0.012	0.024
740	0.009	-0.002	0.014	0.014	0.024
741	0.007	-0.004	0.013	0.012	0.023
742	0.004	-0.006	0.014	0.009	0.024
743	0.007	-0.006	0.017	0.013	0.027
744	0.01	-0.004	0.012	0.019	0.026
745	0.013	-0.004	0.011	0.021	0.025
746	0.01	-0.006	0.01	0.016	0.023
747	0.006	-0.006	0.013	0.014	0.025
748	0.004	-0.007	0.01	0.012	0.023
749	0.005	-0.005	0.01	0.01	0.02
750	0.008	-0.005	0.01	0.008	0.018
751	0.009	-0.007	0.013	0.009	0.018
752	0.008	-0.007	0.014	0.009	0.02
753	0.01	-0.003	0.013	0.008	0.019
754	0.013	-0.002	0.013	0.01	0.017
755	0.01	-0.007	0.012	0.012	0.016
756	0.007	-0.01	0.011	0.012	0.017
757	0.007	-0.004	0.013	0.014	0.019
758	0.013	-0.001	0.015	0.015	0.02
759	0.015	-0.004	0.014	0.014	0.021
760	0.014	-0.008	0.009	0.014	0.021
761	0.009	-0.01	0.004	0.013	0.022
762	0.009	-0.009	0.006	0.011	0.022
763	0.009	-0.007	0.01	0.01	0.02
764	0.01	-0.004	0.011	0.011	0.018
765	0.009	-0.002	0.011	0.012	0.017
766	0.009	0	0.014	0.016	0.02
767	0.008	-0.003	0.013	0.015	0.021
768	0.006	-0.008	0.012	0.013	0.021
769	0.01	-0.01	0.009	0.009	0.017
770	0.011	-0.005	0.007	0.006	0.015
771	0.012	-0.005	0.008	0.004	0.015
772	0.008	-0.008	0.008	0.005	0.014
773	0.008	-0.009	0.009	0.011	0.012
774	0.008	-0.006	0.007	0.009	0.014
775	0.012	-0.008	0.011	0.005	0.017
776	0.014	-0.007	0.01	0.007	0.023
777	0.013	-0.006	0.011	0.014	0.02
778	0.007	-0.005	0.007	0.014	0.015
779	0.005	-0.013	0.007	0.008	0.015
780	0.004	-0.014	0.007	0.009	0.021
781	0.006	-0.009	0.01	0.013	0.024
782	0.011	0.001	0.014	0.019	0.026
783	0.013	-0.003	0.013	0.015	0.028
784	0.01	-0.008	0.012	0.014	0.026
785	0.01	-0.012	0.009	0.011	0.017
786	0.008	-0.013	0.006	0.007	0.008
787	0.008	-0.007	0.009	0.009	0.009
788	0.007	-0.005	0.01	0.014	0.015
789	0.008	-0.006	0.01	0.015	0.02
790	0.005	-0.007	0.008	0.011	0.016
791	0.002	-0.007	0.003	0.008	0.013
792	0.009	-0.008	0.004	0.01	0.018
793	0.018	-0.008	0.011	0.018	0.024
794	0.025	0.001	0.018	0.022	0.025
795	0.016	-0.005	0.011	0.011	0.018
796	0.005	-0.014	0.002	0.003	0.012
797	0	-0.019	-0.004	0.001	0.005
798	0.009	-0.014	0.008	0.009	0.011
799	0.008	-0.014	0.009	0.008	0.009
800	0.004	-0.014	0.007	0.005	0.011
801	0.012	-0.005	0.007	0.009	0.012
802	0.014	-0.001	0.01	0.008	0.017
803	0.009	-0.002	0.011	0.009	0.014
804	0.014	-0.003	0.02	0.017	0.021
805	0.031	0.005	0.029	0.028	0.035
806	0.014	-0.002	0.018	0.014	0.025
807	0.004	-0.009	0.012	0.007	0.016
808	0.011	-0.002	0.014	0.014	0.02
809	0.019	0.003	0.017	0.014	0.026
810	0.005	-0.007	0.01	0.004	0.019
811	0.008	-0.017	0.002	0.004	0.019
812	0.009	-0.017	0.006	0.001	0.02
813	0.014	-0.003	0.023	0.01	0.025
814	0.004	-0.003	0.028	0.011	0.025
815	0.007	-0.008	0.012	0.012	0.021
816	-0.001	-0.016	-0.006	0.01	0.01
817	-0.006	-0.021	-0.01	0.007	0.012
818	-0.01	-0.026	0	-0.008	0.015
819	0.001	-0.02	0.004	-0.013	0.018
820	0.007	-0.01	0.002	-0.002	0.015
821	0.012	-0.007	0.006	0.009	0.017
822	0.011	-0.008	0.01	0.012	0.019
823	0.013	-0.007	0.009	0.01	0.023
824	0.009	-0.005	0.008	0.011	0.021
825	0.005	-0.008	0.008	0.006	0.014
826	0.002	-0.011	0.007	0.001	0.013
827	0.008	-0.01	0.008	0.004	0.015
828	0.009	-0.009	0.01	0.012	0.02
829	0.009	-0.009	0.017	0.01	0.017
830	0.008	-0.01	0.013	0	0.01
831	0.005	-0.015	0.006	-0.003	0.001
832	0.001	-0.017	-0.003	-0.001	0.004
833	0	-0.014	-0.001	0.004	0.014
834	0.012	-0.006	0.009	0.012	0.023
835	0.013	-0.01	0.016	0.015	0.022
836	0.005	-0.013	0.011	0.009	0.015
837	-0.004	-0.017	0.001	0.002	0.008
838	0.002	-0.006	0.009	0.006	0.006
839	0.001	-0.01	0.01	0.007	0.01
840	0.014	-0.005	0.019	0.019	0.024
