# Supplementary material for: Comparative efficacy of Knema retusa extract delivery via PEG-b-PCL, niosome, and their combination against Acanthamoeba triangularis genotype T4: characterization, inhibition, anti-adhesion, and cytotoxic activity
Source: PeerJ journal article supplement (doi:10.7717/peerj.18452), 2024-11-15
Supplement: DataS2.xlsx [file DataS2.xlsx]

## Sheet: Sheet1
	Experiment			Theorical	Yield					Drug/STD Curve			Theorical	%EE					DLC			Theorical
	Tube 1	Tube 2	Tube 3	mg	%	%	%	Avg	SD	Tube 1	Tube 2	Tube 3	mg	%	%	%	Avg	SD	%	%	%		Avg	SD
Drug loaded PEG-b-PCL	80.2	84.5	86.3	100	80.2	84.5	86.3	83.6667	3.13422	1.5	2	1.9	10	15	20	19	18	2.64575	1.87032	2.36686	2.20162	10	2.14627	0.252855
Drug loaded Niosome	30	33.4	34.2	30.652	81.0811	90.2703	92.4324	87.9279	6.02729	6.3	6.8	6	10	63	68	60	63.6667	4.04145	21	20.3593	17.5439	32.6243	19.6344	1.83857
Drug loaded PEG-b-PCL and Niosome	111	106.2	105.1	120.652	87.4016	83.622	82.7559	84.5932	2.4704	7.8	8.2	7.9	10	78	82	79	79.6667	2.08167	7.02703	7.72128	7.51665	8.2883	7.42165	0.356743
Characterization and distribution of niosomes containing ursolic acid coated with chitosan layer		mol ratio	g
Span60 g/l	430.62	3	1291.9	1.67063	12.919
Chloresterol g/l	386.65	2	773.3	1	7.733
PEG-b-PCL					90
Drug					10
