# Supplementary material for: Comparative efficacy of Knema retusa extract delivery via PEG-b-PCL, niosome, and their combination against Acanthamoeba triangularis genotype T4: characterization, inhibition, anti-adhesion, and cytotoxic activity
Source: PeerJ journal article supplement (doi:10.7717/peerj.18452), 2024-11-15
Supplement: DataS4.xlsx [file DataS4.xlsx]

## Sheet: Cell inhbition (MIC)Trophozoite
Nanoparticles	Cell inhibition (%) at 24 h
	AT
	0.25 mg/mL			0.125 mg/mL
	n1	n2	n3	n1	n2	n3		MIC = 90% Acanthamoeba inhibition
KRe-loaded PEG-b-PCL	26	26.68	22.54	23.18	21.23	24.08		RED denoted MIC value of each nanoparticles on the selected strain
KRe-loaded niosome	100	100	100	19.77	15.48	18.32
KRe-loaded PEG-b-PCL and niosome	89.54	85.62	89.45	35.72	38.45	34.92
Nanoparticles	Cell inhibition (%) at 24 h
	AC5
	1 mg/mL			0.5 mg/mL
	n1	n2	n3	n1	n2	n3
KRe-loaded PEG-b-PCL	23.33	23.44	25.77	0.83	0.77	0.79
KRe-loaded niosome	100	100	100	50.61	49.89	46.67
KRe-loaded PEG-b-PCL and niosome	100	100	100	61.67	61.25	65.55
Nanoparticles	Cell inhibition (%) at 24 h
	AP
	1 mg/mL			0.5 mg/mL
	n1	n2	n3	n1	n2	n3
KRe-loaded PEG-b-PCL	5	5.67	5.12	3	3.69	4.81
KRe-loaded niosome	36.67	40	35.11	2.11	2.89	2.05
KRe-loaded PEG-b-PCL and niosome	30.33	30.57	32.34	3.44	4.56	3.59
Nanoparticles	Cell inhibition (%) at 24 h
	AC3
	1 mg/mL			0.5 mg/mL
	n1	n2	n3	n1	n2	n3
KRe-loaded PEG-b-PCL	76.77	75.67	79.51	65.78	67.71	68.98
KRe-loaded niosome	54	54.78	57.09	70	76.23	71.97
KRe-loaded PEG-b-PCL and niosome	43	44.55	43.09	48	49.84	50
The data showed replication in three indepent experiments (n1-n3)
AT; A. triangularis WU19001, AC3; A. castellanii ATCC30010, AC5; A. castellanii ATCC50739, AP; A. polyphaga ATCC30461

## Sheet: Cell inhbiton (MIC) Cyst
Nanoparticles	Cell inhibition (%) at 24 h
	AT
	1 mg/mL			0.5 mg/mL				MIC = 90% Acanthamoeba inhibition
	n1	n2	n3	n1	n2	n3		RED denoted MIC value of each nanoparticles on the selected strain
KRe-loaded PEG-b-PCL	52	55	55.78	45.44	46.112	45.09
KRe-loaded niosome	53.22	52.89	51.11	55.1	55.13	56.79
KRe-loaded PEG-b-PCL and niosome	49.81	49.99	51.31	52	51.03	49.45
Nanoparticles	Cell inhibition (%) at 24 h
	AC5
	1 mg/mL			0.5 mg/mL
	n1	n2	n3	n1	n2	n3
KRe-loaded PEG-b-PCL	50.26	51.11	52.3	55.01	56.97	56.22
KRe-loaded niosome	50.11	55.71	54.32	52.55	52.03	53.05
KRe-loaded PEG-b-PCL and niosome	44.87	43.23	48.74	48.99	47.89	47.65
Nanoparticles	Cell inhibition (%) at 24 h
	AP
	1 mg/mL			0.5 mg/mL
	n1	n2	n3	n1	n2	n3
KRe-loaded PEG-b-PCL	65.99	67.11	66.53	60.11	62.44	62.09
KRe-loaded niosome	45.89	45.65	44.69	44.44	46.07	46.12
KRe-loaded PEG-b-PCL and niosome	45.66	44.89	48.39	44.23	46.71	45.38
Nanoparticles	Cell inhibition (%) at 24 h
	AC3
	1 mg/mL			0.5 mg/mL
	n1	n2	n3	n1	n2	n3
KRe-loaded PEG-b-PCL	50	49.98	48.98	44.01	42.32	44.95
KRe-loaded niosome	48.13	49.58	49.89	44.44	44.38	44.94
KRe-loaded PEG-b-PCL and niosome	47.86	46.64	47.05	45.98	46.78	46.92
The data showed replication in three indepent experiments (n1-n3)
AT; A. triangularis WU19001, AC3; A. castellanii ATCC30010, AC5; A. castellanii ATCC50739, AP; A. polyphaga ATCC30461
