# Supplementary material for: Comparative efficacy of Knema retusa extract delivery via PEG-b-PCL, niosome, and their combination against Acanthamoeba triangularis genotype T4: characterization, inhibition, anti-adhesion, and cytotoxic activity
Source: PeerJ journal article supplement (doi:10.7717/peerj.18452), 2024-11-15
Supplement: DataS5.xlsx [file DataS5.xlsx]

## Sheet: Adhesion
Adhesion-nano
											mean	SD
	1	2	3	4	5	6			1/2 KRe loaded niosome	1/2 × MIC	45.7217	5.5209
1/2 KRe loaded niosome	0.2406	0.2946	0.2018	0.2891	0.1868	0.1924			1/4 KRe loaded niosome	1/4 × MIC	67.0484	2.9755
1/4 KRe loaded niosome	0.4084	0.3262	0.3358	0.2999	0.3025	0.3022			1/2 Chlorhexidine	1/2 × MIC	76.5774	1.01418
1/2 Chlorhexidine	0.3513	0.3598	0.3521	0.4348	0.3229	0.3362			1/4 Chlorhexidine	1/4 × MIC	94.6341	7.09784
1/4 Chlorhexidine	0.4167	0.3117	0.4214	0.5154	0.4758	0.5101			1% DMSO	1% DMSO	100	7.12858
Control	0.5004	0.4387	0.408	0.6092	0.417	0.4493
				%	%	%	mean	SD
1/2 KRe loaded niosome	0.2406	0.2018	0.1924	51.9879	43.6041	41.573	45.7217	5.5209
1/4 KRe loaded niosome	0.3025	0.3022	0.3262	65.363	65.2982	70.484	67.0484	2.9755
1/2 Chlorhexidine	0.3513	0.3598	0.3521	75.9075	77.7442	76.0804	76.5774	1.01418
1/4 Chlorhexidine	0.4167	0.4214	0.4758	90.0389	91.0545	102.809	94.6341	7.09784
Control	0.5004	0.4493	0.4387	108.124	97.083	94.7926	100	7.12858
Control	0.5004	0.4493	0.4387	0.4628

## Sheet: Removal
Removal-nano
													mean	SD
		7	8	9	10	11	12				2 KRe loaded niosome	2 × MIC	92.8985	0.444962
2 KRe loaded niosome		0.0831	0.0937	0.0626	0.0763	0.0723	0.0673				1 KRe loaded niosome	1 × MIC	79.748	2.54987
1 KRe loaded niosome		0.2913	0.2557	0.1786	0.2302	0.2069	0.1011				2 Chlorhexidine	2 × MIC	94.3458	0.102549
1 Chlorhexidine		0.5875	0.7774	0.6938	0.7672	0.697	0.5224				1 Chlorhexidine	1 × MIC	34.9286	6.14926
2 Chlorhexidine		0.0576	0.0653	0.0567	0.0567	0.0585	0.0596				1% DMSO	1% DMSO	0	2.91159
Control		0.9794	1.0285	1.0323	0.8321	0.834	0.7607
					%	%	%	mean	SD	%Removal
2 KRe loaded niosome		0.0763	0.0723	0.0673	7.52911	7.1344	6.64101	7.10151	0.444962	92.8985
1 KRe loaded niosome		0.2302	0.2069	0.1786	22.7156	20.4164	17.6238	20.252	2.54987	79.748
2 Chlorhexidine		0.0567	0.0567	0.0585	5.59503	5.59503	5.77265	5.65423	0.102549	94.3458
1 Chlorhexidine		0.6938	0.5875	0.697	68.4626	57.9732	68.7784	65.0714	6.14926	34.9286
Control		0.9794	1.0285	1.0323	96.645	101.49	101.865	100	2.91159	0
Control		0.9794	1.0285	1.0323	1.0134
