# Supplementary material for: Comparative efficacy of Knema retusa extract delivery via PEG-b-PCL, niosome, and their combination against Acanthamoeba triangularis genotype T4: characterization, inhibition, anti-adhesion, and cytotoxic activity
Source: PeerJ journal article supplement (doi:10.7717/peerj.18452), 2024-11-15
Supplement: DataS6.xlsx [file DataS6.xlsx]

## Sheet: Vero
Concentration (mg/mL)	NPs-unloaded KRe			KRe-loaded PEG-b-PCL			KRe-loaded niosome			KRe-loaded PEG-b-PCL and niosome
0	100	100	100	100	100	100	100	100	100	100	100	100
0.008	100	104.659	103	107.54	109.718	109.29	118.857	118.686	111.743	107.204	105.348	103.633
0.016	108.827	120.11	110.45	111.028	115	113.046	101.45	108.745	104.122	97.2704	93.3683	98.2174
0.031	108.631	100.782	115.99	113.95	113.111	115.561	113.597	110	111.011	107.424	108.242	108.74
0.063	94.1196	96.4196	98.43	90.7448	85.6326	90.4878	83.4536	75.3068	85.9403	88.5496	76.8479	86.3419
0.125	91.6729	89.34	81.889	96.0846	89.6084	89.9503	82.0974	76.5586	85.0629	89.7873	76.468	76.8698
0.25	90.22	90.5072	76.9622	95.2027	90.0055	86.5211	76.8109	78.4364	67.7809	43.7634	47.2561	36.7389
0.5	76.789	72.4883	73.6537	80.3231	69.764	58.2162	22.8637	22.7498	24.5235	2.34196	1.91235	3.18824
1	66.1575	65.326	55.272	0.755948	0.695007	0.611696	1.37849	1.09215	1.14925	1.00052	1.21734	0.945349

## Sheet: HaCaT
Concentration (mg/mL)	NPs-unloaded KRe				KRe-loaded PEG-b-PCL				KRe-loaded niosome				KRe-loaded PEG-b-PCL and niosome
0	100	100	100	100	100	100	100	100	100	100	100	100	100	100	100	100
0.008	116.025	101.272	107.08	107.08		86.0464	94.0958	94.3082	107.171	109.129	108.296	108.349	116.936	116.976	116.811	118.185
0.016	86.9947		75.1261	75.1261		82.4127	99.3416	99.1505	109.516	108.415	109.171	100.116	80.588	97.6877	94.1807	92.418
0.031	81.5306	91.7146	82.9429	82.9429	96.08	96.53	99.08	99.08		101.134	107.879	108.421	97.8751		99.8513	100.934
0.063	69.7875	80.5059	71.7911	71.7911	99.5932	109.607	100.95	100.167	89.5289	84.5263	86.8642	86.6412	80.8883	86.3691	85.0696	85.3457
0.125	66.3045	65.2227	61.5666	61.5666	101	109.088	104.676	104.569	88.8066	85.5558	84.8465	85.4412	79.2603	76.5835	70.6488	71.1373
0.25	39.0478	54.8319	56.0436	56.0436	100.33	100.604	100.765	101.147	72.7484	74.5314	77.3495	77.976	29.4136	24.1833	36.2111	36.2961
0.5	27.0011	32.2327	39.3688	39.3688	76.1355	70.9541	78.1884	78.6238	12.2457	15.5295	10.4173	9.8439	2.82793	3.46442	3.06892	2.75034
1	0.207701	2.18116	4.79909	4.79909	2.58421	3.62241	4.27949	4.03526	4.88631	6.70315	6.7856	6.26527	4.95287	5.23613	5.25645	5.27769
