# Supplementary material for: Comparative efficacy of Knema retusa extract delivery via PEG-b-PCL, niosome, and their combination against Acanthamoeba triangularis genotype T4: characterization, inhibition, anti-adhesion, and cytotoxic activity
Source: PubMed Central journal article supplement — PeerJ. 2024 Nov 15;12:e18452. doi: 10.7717/peerj.18452 (PMC11572385; doi:10.7717/peerj.18452), 2024-11-15

SEM  
Drug loaded  
PEG-*b*-PCL

SEM  
Drug loaded  
Niosome

SEM  
Drug loaded PEG-  
*b*-PCL and  
Niosome

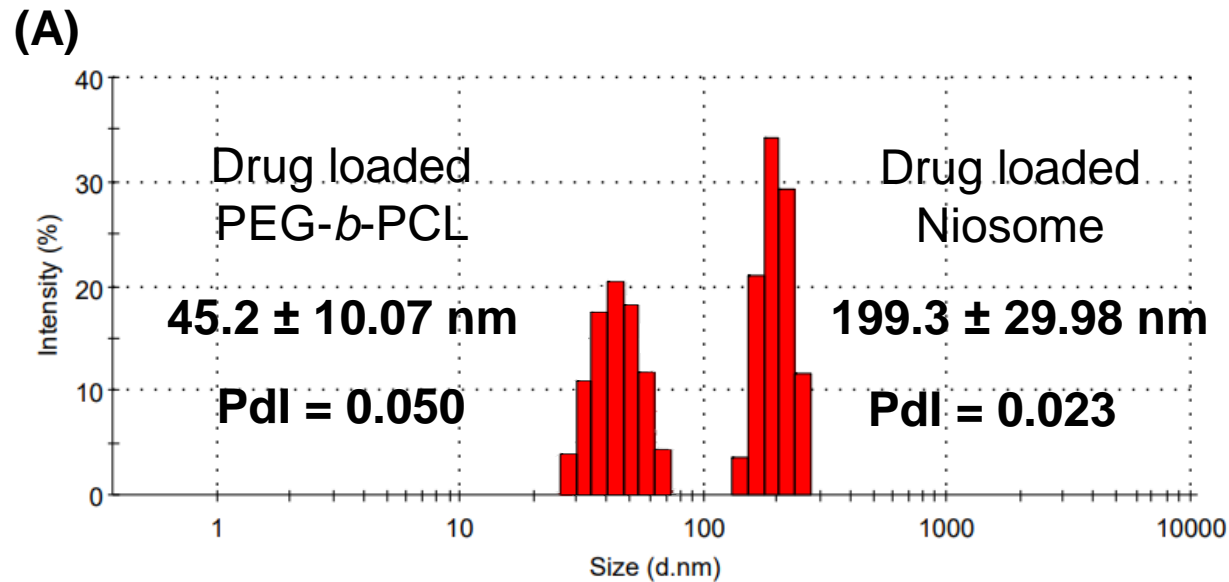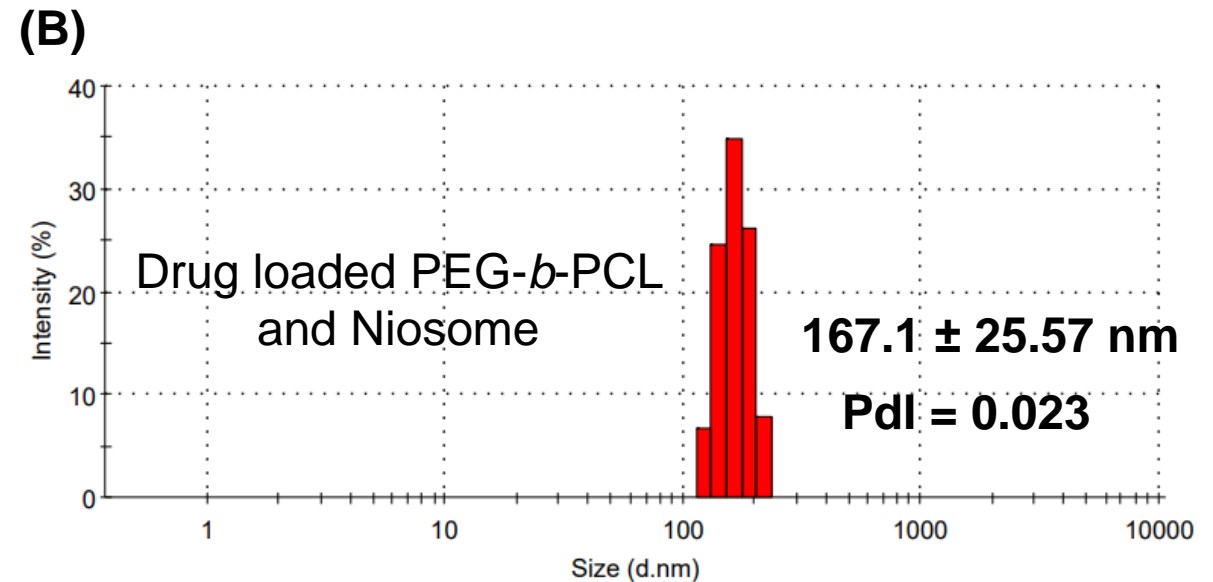

Drug loaded PEG-b-PCL

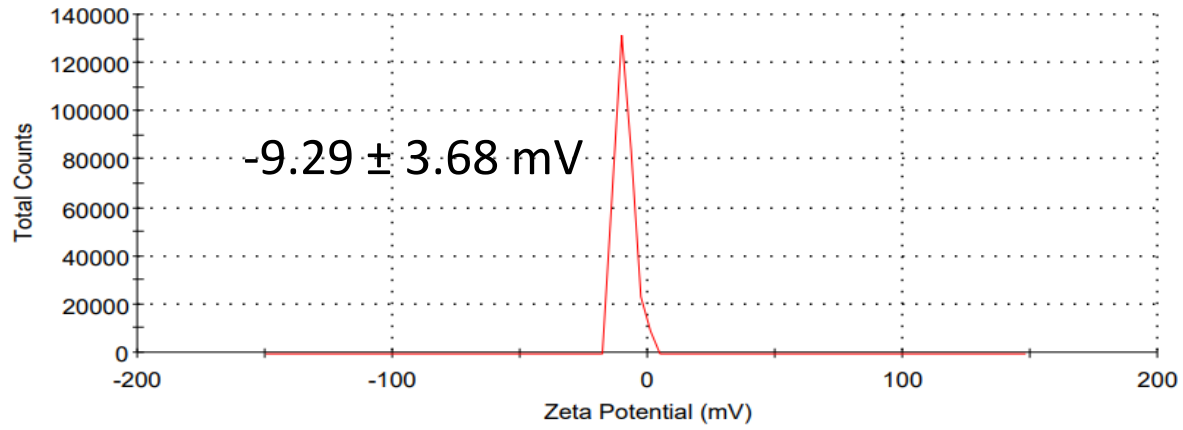

Drug loaded Niosome

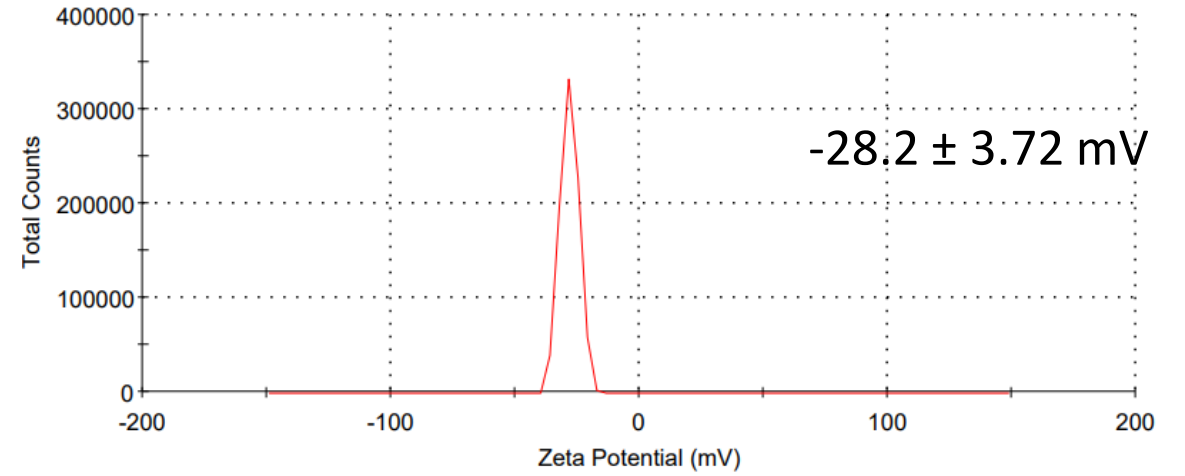

Drug loaded PEG-b-PCL and Niosome

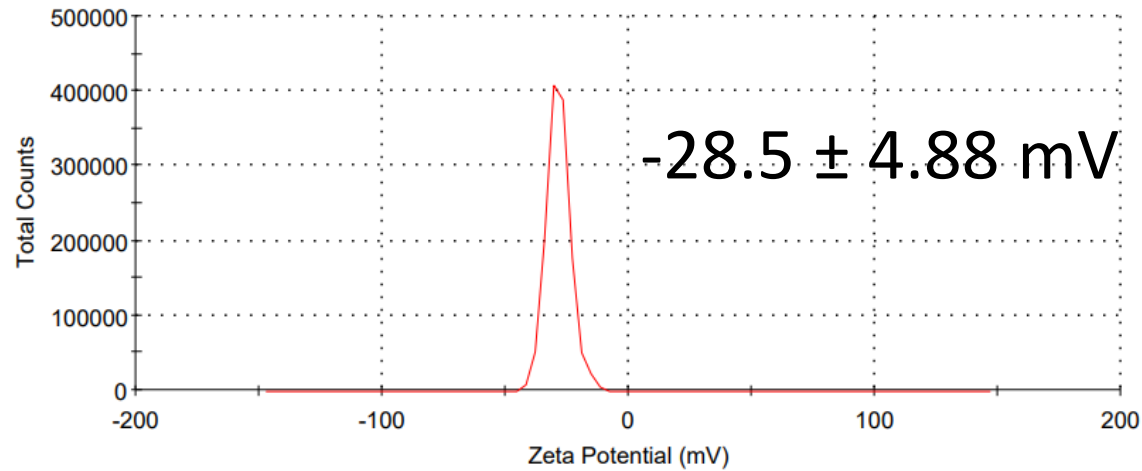

Supplement: peerj-12-18452-s003.pdf [file peerj-12-18452-s003.pdf]
